# Supplementary material
Source: PubMed Central journal article supplement (PMC6383751)
Supplement: NIHMS80493-supplement-Supplement.pdf [file NIHMS80493-supplement-Supplement.pdf]

## Supplementary materials

Supplementary Table 1. Features of sleep macrostructure by group and p-value of ANCOVA including level of education as covariate.

|                            | Cognition + |        | Cognition - |        | p       |
|----------------------------|-------------|--------|-------------|--------|---------|
|                            | Mean        | SD     | Mean        | SD     |         |
| Total sleep duration (min) | 423.3       | ± 75.5 | 427.5       | ± 77.0 | 0.741   |
| Total W duration (min)     | 55.1        | ± 49.8 | 69.0        | ± 45.0 | 0.026 * |
| Total REM duration (min)   | 60.2        | ± 29.4 | 64.0        | ± 28.9 | 0.718   |
| Total N1 duration (min)    | 75.8        | ± 48.8 | 80.7        | ± 51.8 | 0.453   |
| Total N2 duration (min)    | 200.7       | ± 55.4 | 188.6       | ± 59.3 | 0.083   |
| Total N3 duration (min)    | 30.9        | ± 33.6 | 25.3        | ± 27.9 | 0.418   |
| Relative W duration (%)    | 12.9        | ± 10.6 | 16.4        | ± 10.6 | 0.016 * |
| Relative REM duration (%)  | 14.0        | ± 6.0  | 14.9        | ± 6.1  | 0.671   |
| Relative N1 duration (%)   | 17.8        | ± 10.5 | 18.5        | ± 10.3 | 0.582   |
| Relative N2 duration (%)   | 47.7        | ± 11.3 | 44.2        | ± 12.1 | 0.028 * |
| Relative N3 duration (%)   | 7.4         | ± 8.1  | 5.9         | ± 6.4  | 0.327   |
| Number of W episodes       | 14.4        | ± 5.2  | 14.1        | ± 5.4  | 0.888   |
| Number of REM episodes     | 4.5         | ± 1.8  | 4.6         | ± 2.1  | 0.727   |
| Number of N1 episodes      | 16.5        | ± 5.4  | 16.2        | ± 4.8  | 0.636   |
| Number of N2 episodes      | 10.3        | ± 3.9  | 10.3        | ± 3.7  | 0.602   |
| Number of N3 episodes      | 4.1         | ± 3.4  | 3.7         | ± 3.3  | 0.643   |
| Mean W duration (min)      | 10.8        | ± 5.7  | 12.1        | ± 5.0  | 0.066   |
| Mean REM duration (min)    | 19.9        | ± 5.7  | 21.3        | ± 8.2  | 0.394   |
| Mean N1 duration (min)     | 13.8        | ± 7.2  | 14.5        | ± 10.9 | 0.392   |
| Mean N2 duration (min)     | 34.1        | ± 17.8 | 30.3        | ± 11.7 | 0.090   |
| Mean N3 duration (min)     | 15.1        | ± 7.2  | 14.4        | ± 6.4  | 0.652   |
| Sleep latency (min)        | 12.9        | ± 13.1 | 14.9        | ± 16.0 | 0.528   |
| REM sleep latency (min)    | 90.9        | ± 52.5 | 91.7        | ± 58.0 | 0.789   |
| Sleep efficiency (%)       | 84.4        | ± 10.9 | 80.7        | ± 11.2 | 0.018 * |

\*Cognition +: positive cognitive change. \*Cognition -: negative cognitive change. \*p: p-values of ANCOVA.

Supplementary Table 2. Feature of EEG rhythmicity during N2 sleep by group and p-value of ANCOVA including level of education as covariate.

| Band-power in N2        | Channel | Cognition + |         | Cognition - |         | p       |
|-------------------------|---------|-------------|---------|-------------|---------|---------|
|                         |         | Mean        | SD      | Mean        | SD      |         |
| Slow waves (0.5–1.5 Hz) | F3      | 93.5        | ± 70.7  | 117.3       | ± 87.4  | 0.022 * |
|                         | F4      | 99.1        | ± 76.4  | 121.4       | ± 88.2  | 0.028 * |
|                         | C3      | 64.1        | ± 48.5  | 74.9        | ± 47.2  | 0.044 * |
|                         | C4      | 64.0        | ± 45.5  | 77.9        | ± 46.0  | 0.016 * |
|                         | O1      | 17.2        | ± 15.3  | 25.8        | ± 19.4  | 0.001 * |
|                         | O2      | 21.0        | ± 21.2  | 26.2        | ± 19.2  | 0.047 * |
| Delta (1.5–4 Hz)        | F3      | 156.4       | ± 117.2 | 173.1       | ± 98.5  | 0.180   |
|                         | F4      | 172.1       | ± 127.1 | 183.8       | ± 103.2 | 0.280   |
|                         | C3      | 123.6       | ± 89.7  | 128.7       | ± 68.5  | 0.298   |
|                         | C4      | 128.2       | ± 93.9  | 138.5       | ± 76.2  | 0.209   |
|                         | O1      | 28.3        | ± 26.3  | 36.2        | ± 23.1  | 0.024 * |
|                         | O2      | 34.0        | ± 33.4  | 39.1        | ± 27.5  | 0.203   |
| Theta (4–7.5 Hz)        | F3      | 50.1        | ± 29.1  | 54.7        | ± 19.7  | 0.170   |
|                         | F4      | 57.2        | ± 35.3  | 59.9        | ± 22.0  | 0.368   |
|                         | C3      | 50.1        | ± 31.5  | 51.6        | ± 20.5  | 0.543   |
|                         | C4      | 52.3        | ± 33.6  | 56.2        | ± 25.4  | 0.254   |
|                         | O1      | 20.4        | ± 19.2  | 25.0        | ± 18.8  | 0.129   |
|                         | O2      | 25.3        | ± 25.3  | 28.4        | ± 26.2  | 0.402   |
| Alpha (7.5–11 Hz)       | F3      | 25.0        | ± 18.3  | 29.2        | ± 17.6  | 0.093   |
|                         | F4      | 28.3        | ± 23.1  | 30.7        | ± 18.1  | 0.304   |
|                         | C3      | 24.4        | ± 15.6  | 26.9        | ± 17.7  | 0.260   |
|                         | C4      | 24.8        | ± 16.1  | 28.1        | ± 17.6  | 0.166   |
|                         | O1      | 9.2         | ± 7.6   | 11.3        | ± 8.8   | 0.090   |
|                         | O2      | 10.6        | ± 8.9   | 12.2        | ± 10.4  | 0.244   |
| Sigma (11–15 Hz)        | F3      | 19.2        | ± 12.2  | 20.2        | ± 10.4  | 0.604   |
|                         | F4      | 20.9        | ± 13.5  | 21.7        | ± 11.9  | 0.747   |
|                         | C3      | 20.5        | ± 13.2  | 21.3        | ± 11.9  | 0.551   |
|                         | C4      | 21.0        | ± 13.6  | 22.3        | ± 12.3  | 0.515   |
|                         | O1      | 5.9         | ± 5.1   | 6.6         | ± 4.4   | 0.280   |
|                         | O2      | 6.6         | ± 5.9   | 6.9         | ± 4.7   | 0.628   |
| Beta (15–30 Hz)         | F3      | 14.7        | ± 9.4   | 13.1        | ± 5.9   | 0.113   |
|                         | F4      | 15.8        | ± 10.6  | 14.0        | ± 6.5   | 0.111   |
|                         | C3      | 14.5        | ± 8.1   | 13.8        | ± 7.0   | 0.509   |
|                         | C4      | 14.7        | ± 7.7   | 14.5        | ± 7.4   | 0.694   |
|                         | O1      | 5.6         | ± 4.8   | 6.0         | ± 4.4   | 0.589   |
|                         | O2      | 6.1         | ± 5.3   | 6.1         | ± 4.5   | 0.869   |

'Cognition +': positive cognitive change. 'Cognition -': negative cognitive change. 'p': p-values of ANCOVA.

Supplementary Table 3. Features of functional connectivity in REM by group and p-value of ANCOVA including level of education as covariate.

| Coherence in REM        | Channel | Cognition + |        | Cognition - |        | p       |
|-------------------------|---------|-------------|--------|-------------|--------|---------|
|                         |         | Mean        | SD     | Mean        | SD     |         |
| Slow waves (0.5–1.5 Hz) | F3-F4   | 0.76        | ± 0.13 | 0.76        | ± 0.13 | 0.755   |
|                         | C3-C4   | 0.80        | ± 0.11 | 0.78        | ± 0.11 | 0.318   |
|                         | O1-O2   | 0.69        | ± 0.14 | 0.65        | ± 0.18 | 0.066   |
| Delta (1.5–4 Hz)        | F3-F4   | 0.83        | ± 0.09 | 0.81        | ± 0.11 | 0.258   |
|                         | C3-C4   | 0.82        | ± 0.09 | 0.78        | ± 0.11 | 0.021 * |
|                         | O1-O2   | 0.67        | ± 0.13 | 0.62        | ± 0.17 | 0.017 * |
| Theta (4–7.5 Hz)        | F3-F4   | 0.81        | ± 0.09 | 0.80        | ± 0.10 | 0.306   |
|                         | C3-C4   | 0.75        | ± 0.12 | 0.71        | ± 0.12 | 0.032 * |
|                         | O1-O2   | 0.59        | ± 0.15 | 0.55        | ± 0.16 | 0.059   |
| Alpha (7.5–11 Hz)       | F3-F4   | 0.76        | ± 0.10 | 0.74        | ± 0.11 | 0.219   |
|                         | C3-C4   | 0.66        | ± 0.14 | 0.61        | ± 0.14 | 0.030 * |
|                         | O1-O2   | 0.53        | ± 0.15 | 0.51        | ± 0.17 | 0.264   |
| Sigma (11–15 Hz)        | F3-F4   | 0.71        | ± 0.11 | 0.70        | ± 0.11 | 0.346   |
|                         | C3-C4   | 0.63        | ± 0.15 | 0.56        | ± 0.14 | 0.017 * |
|                         | O1-O2   | 0.51        | ± 0.16 | 0.49        | ± 0.16 | 0.292   |
| Beta (15–30 Hz)         | F3-F4   | 0.60        | ± 0.13 | 0.59        | ± 0.13 | 0.846   |
|                         | C3-C4   | 0.55        | ± 0.16 | 0.50        | ± 0.13 | 0.034 * |
|                         | O1-O2   | 0.46        | ± 0.16 | 0.46        | ± 0.17 | 0.713   |

\*Cognition +: positive cognitive change. \*Cognition -: negative cognitive change. \*p: p-values of ANCOVA.
